1 **Quantification of dengue virus specific T cell responses and correlation**  
2 **with viral load and clinical disease severity in acute dengue infection**

3

4 **Short title: Association of dengue specific T cells with clinical disease severity**

5

6 Dulharie T. Wijeratne<sup>1</sup>, Samitha Fernando<sup>1</sup>, Laksiri Gomes<sup>1</sup>, Chandima Jeewandara<sup>1</sup>,  
7 Anushka Ginneliya<sup>1</sup>, Supun Samarasekara<sup>1</sup>, Ananda Wijewickrama<sup>2</sup>, Clare S. Hardman<sup>3</sup>,  
8 Graham S. Ogg<sup>3</sup>, Gathsaurie Neelika Malavige<sup>1,3</sup>

9

10 <sup>1</sup>Centre for Dengue Research, University of Sri Jayewardenepura, Nugegoda, Sri Lanka

11 <sup>2</sup>Infectious Diseases Hospital, Angoda, Sri Lanka

12 <sup>3</sup>Weatherall Institute of Molecular Medicine, John Radcliffe Hospital, Oxford, OX3 9DS,  
13 UK

14

15

16

17 Correspondence should be addressed to:

18 Prof. Gathsaurie Neelika Malavige DPhil, FRCP, FRCPath

19 Centre for Dengue Research, Faculty of Medical Sciences,

20 University of Sri Jayawardanapura, Sri Lanka

21 Tel +94 (0) 772443193; Fax: +94 (0) 112802026

22 Email: [gathsaurie.malavige@ndm.ox.ac.uk](mailto:gathsaurie.malavige@ndm.ox.ac.uk)

23

24

25

26 **Abstract**

27 **Background:** In order to understand the role of dengue virus (DENV) specific T cell  
28 responses that associate with protection, we studied their frequency and phenotype in relation  
29 to clinical disease severity and resolution of viraemia in a large cohort of patients with  
30 varying severity of acute dengue infection.

31 **Methodology/Principal findings:** Using ex vivo IFN $\gamma$  ELISpot assays we determined the  
32 frequency of dengue viral peptide (DENV)-NS3, NS1 and NS5 responsive T cells in 74 adult  
33 patients with acute dengue infection and examined the association of responsive T cell  
34 frequency with the extent of viraemia and clinical disease severity. We found that total  
35 DENV-specific and DENV-NS3-specific T cell responses, were higher in patients with  
36 dengue fever (DF), when compared to those with dengue haemorrhagic fever (DHF). In  
37 addition, early appearance of DENV-specific T cell responses was significantly associated  
38 with milder clinical disease ( $p=0.02$ ). DENV peptide specific T cell responses inversely  
39 correlated with the degree of viraemia, which was most significant for DENV-NS3 specific  
40 T cell responses (Spearman's  $r = -0.47$ ,  $p=0.0003$ ). The frequency of T cell responses to NS1,  
41 NS5 and pooled DENV peptides, correlated with the degree of thrombocytopenia but had no  
42 association with levels of liver transaminases. In contrast, DENV-IgG inversely correlated  
43 with the degree of thrombocytopenia and levels of liver transaminases.

44 **Conclusions/significance:** Early appearance of DENV-specific T cell IFN $\gamma$  responses  
45 appears to associate with milder clinical disease and resolution of viraemia, suggesting a  
46 protective role in acute dengue infection.

47

48

49

50

51 **Author summary**

52 In order to understand the role of dengue virus (DENV) specific T cell responses in protection  
53 against infection, we studied T cell cytokine production in relation to clinical disease severity  
54 and resolution of viraemia in a large cohort of patients with varying severity of acute dengue  
55 infection. We found that DENV-specific T cell responses were higher in patients with dengue  
56 fever, when compared to those with dengue haemorrhagic fever. In addition, early  
57 appearance of DENV-specific T cell responses was significantly associated with milder  
58 clinical disease ( $p=0.02$ ). DENV peptide specific T cell responses inversely correlated with  
59 the degree of viraemia, which was most significant for DENV-NS3 specific T cell responses  
60 (Spearman's  $r = -0.47$ ,  $p=0.0003$ ). The frequency of NS1, NS5 and pooled DENV peptides,  
61 correlated with the degree of thrombocytopenia but had no association with liver  
62 transaminases. Our data suggest that early appearance of DENV-specific T cell  $IFN\gamma$   
63 responses appear to associate with milder clinical disease and resolution of viraemia,  
64 suggesting a protective role in acute dengue infection.

65

66

## 67 **Introduction**

68 Dengue virus is the cause of the most common mosquito-borne viral infection worldwide,  
69 indeed over half of the global population live in areas where there is intense dengue  
70 transmission putting them at risk of dengue infection [1]. Dengue virus causes 390 million  
71 infections annually, of which nearly a quarter are clinically apparent causing a spectrum of  
72 disease phenotypes ranging from mild dengue fever (DF) to dengue hemorrhagic fever  
73 (DHF). DHF is defined by a transient increase in vascular permeability resulting in plasma  
74 leakage, with high fever, bleeding, thrombocytopenia and haemoconcentration, which can  
75 lead to shock (dengue shock syndrome (DSS))[2]. It is however not fully understood why  
76 some people develop more severe forms of the disease, with patient history, immunity, age,  
77 viral serotype, sub-strain and epidemiological factors all postulated to play a role[3]. It was  
78 highlighted during a recent summit to identify correlates of protection for dengue, that  
79 dengue virus (DENV) specific T cell immunity should be studied in more detail, in order to  
80 develop safe and effective dengue vaccines[4].

81

82 Although a dengue vaccine (Denvaxia®) is now licensed in several countries, the efficacy is  
83 low in dengue seronegative individuals and provides only partial protection against DENV2  
84 [5]. Although it is now generally believed that DENV specific T cells are protective, it is  
85 important that dengue vaccines should not induce “harmful” T cell immunity [4, 6-8]. Indeed,  
86 a significant hurdle in developing an efficacious dengue vaccine has been our limited  
87 understanding of the protective immune response in acute dengue infection and the added  
88 complexity of the presence of four DENV serotypes that are highly homologous. Seemingly  
89 conflicting evidence as to the role of antigen-specific T cells during dengue infection is  
90 reported in the literature.

91 T cell responses to DENV are predominantly directed towards the nonstructural proteins  
92 (NS), with the majority of the CD8+ T cell responses directed towards NS3 followed by NS5  
93 and CD4+ T cell responses to envelope, PrM and NS1 proteins [9-11]. It was believed that  
94 highly cross-reactive T cells specific to DENV-NS3, and other proteins, associate with severe  
95 clinical disease (DHF), and it was thought that these cells contribute to DHF by inducing a  
96 'cytokine storm'[12-15]. It is hypothesized in the 'original antigenic sin' theory that T cell  
97 responses against the initial DENV serotype of primary infection persist and dominate during  
98 subsequent infections; and that these T cells are suboptimal in inducing robust antiviral  
99 responses upon re-challenge [13, 14, 16]. However, it has been shown that DENV-NS3  
100 specific T cell responses were at very low frequency during acute disease, and only detected  
101 in the convalescent phase pointing away from a role in vascular leak [14, 16, 17]. Recently  
102 it was observed that DENV-specific T cells are found in large numbers in the skin during  
103 acute dengue infection, and it is speculated that highly cross-reactive, pathogenic skin T cells  
104 could be contributing to DHF, despite being absent or present at low frequencies in the  
105 peripheral blood [8, 18]. As the frequency of skin resident DENV-specific T cells was  
106 investigated in a small patient cohort, it is not yet clear whether the frequency of the skin T  
107 cells associated with clinical disease severity.

108

109 Conversely some studies in both humans and mouse models have shown that DENV-specific  
110 T cells in the blood are likely to be protective [19-23]. It was shown that in individuals who  
111 were naturally infected with DENV, polyfunctional CD8+ T cells responses of higher  
112 magnitude and breadth were seen for HLA alleles associated with protection [21]. Similar  
113 findings were seen with DENV-specific CD4+ T cell responses [23]. Our previous studies  
114 have also shown that the magnitude of IFN $\gamma$ -producing DENV NS3-specific memory T cell  
115 responses was similar in those who had varying severity of recovered past dengue infection,

116 suggesting that the magnitude of the memory T cell response does not correlate with clinical  
117 disease severity[22]. While many studies have been carried out to elucidate the functionality  
118 of T cell responses in dengue, these have been limited to studying T cells specific for  
119 particular HLA types by using tetramers/pentamers [16, 18], or to investigating T cell  
120 responses in individuals with unknown severity of dengue.

121

122 To aid the generation of an effective vaccine it will be important to understand the role,  
123 phenotype and frequency of dengue-specific T cell responses in relation to clinical disease  
124 severity and clearance of viraemia [6, 7]. Therefore, here we investigate T cell responses to  
125 immunodominant DENV NS proteins in patients with DHF and DF, and analyse the  
126 association of such responses with resolution of viraemia.

127

128

129

130

131

132

133

134

135

136

137

138

139

## 140 **Methods**

### 141 Recruitment of patients for analysis of the functionality of T cell responses

142 We recruited 74 adult patients with acute dengue infection from the National Infectious  
143 Diseases Institute, between day 4 - 8 of illness, following informed written consent. All  
144 clinical features were recorded several times each day, from time of admission to discharge.  
145 Ultra sound scans were performed to determine the presence of fluid leakage in pleural and  
146 peritoneal cavities. Full blood counts, and liver transaminase measurements were performed  
147 serially through the illness. Clinical disease severity was classified according to the 2011  
148 WHO dengue diagnostic criteria [24]. Accordingly, patients with ultrasound scan evidence  
149 of plasma leakage (those who had pleural effusions or ascites) were classified as having DHF.  
150 Shock was defined as having cold clammy skin, along with a narrowing of pulse pressure of  
151  $\leq 20$  mmHg. Based on this classification, 45 patients had DHF and 29 patients had dengue  
152 fever (DF) of the 74 patients recruited for the study.

153

### 154 Ethics statement

155 The study was approved by the Ethical Review Committee of The University of Sri  
156 Jayewardenepura. All patients were adults and recruited post written consent.

157

### 158 Serology

159 Acute dengue infection was confirmed in serum samples using a PCR (see below) and dengue  
160 antibody detection. Dengue antibody assays were completed using a commercial capture-  
161 IgM and IgG ELISA (Panbio, Brisbane, Australia) [25, 26]. Based on the WHO criteria, those  
162 who had an IgM: IgG ratio of  $>1.2$  were considered to have a primary dengue infection, while  
163 patients with IgM: IgG ratios  $<1.2$  were categorized under secondary dengue infection [27].

164 The DENV-specific IgM and IgG ELISA was also used to semi-quantitatively determine the  
165 DENV-specific IgM and IgG titres, which were expressed in PanBio units.

166

#### 167 Qualitative and quantitative assessment of viral loads

168 DENV were serotyped and viral titres quantified as previously described [28]. RNA was  
169 extracted from the serum samples using QIAamp Viral RNA Mini Kit (Qiagen, USA)  
170 according to the manufacturer's protocol. Multiplex quantitative real-time PCR was  
171 performed as previously described using the CDC real time PCR assay for detection of the  
172 dengue virus [29], and modified to quantify the DENV. Oligonucleotide primers and a dual  
173 labeled probe for DENV 1,2,3,4 serotypes were used (Life technologies, India) based on  
174 published sequences [29]. In order to quantify viruses, standard curves of DENV serotypes  
175 were generated as previously described in Fernando, S. *et.al* [28].

176

#### 177 Peptides

178 The peptide arrays spanning DENV NS1 (DENV-2 Singapore/S275/1990, NS1 protein NR-  
179 2751), NS3 (DENV-3, Philippines/H87/1956, NS3 protein, NR-2754) and NS5 proteins  
180 (DENV-2, New Guinea C (NGC), NS5 protein, NR-2746) were obtained from the NIH  
181 Biodefense and Emerging Infections Research Resource Repository, NIAID, NIH. The  
182 DENV NS3 peptide array consisted of 105, 4-17 mers peptides, NS1 and NS5 proteins were  
183 comprised of 60 and 156 peptides respectively. The peptides were reconstituted as  
184 previously described [30]. NS1, NS3 and NS5 peptides were pooled separately to represent  
185 the DENV- NS1, NS3 and NS5 proteins. In addition, total NS1, NS3 and NS5 peptides were  
186 combined to represent a 'DENV-all' pool of peptides.

187

188



189 Ex vivo ELISpot assay

190 Ex vivo IFN $\gamma$  ELISpot assays were carried out as previously discussed using freshly isolated  
191 peripheral blood mononuclear cells (PBMC) obtained from 74 patients [22]. DENV-NS3,  
192 NS1, NS5 and the combined DENV-ALL peptides were added at a final concentration of 10  
193  $\mu$ M and incubated overnight as previously described [16, 31]. All peptides were tested in  
194 duplicate. PHA was included as a positive control of cytokine stimulation and media alone  
195 was applied to the PBMCs as a negative control. The spots were enumerated using an  
196 automated ELISpot reader (AID Germany). Background (PBMCs plus media alone) was  
197 subtracted and data expressed as number of spot-forming units (SFU) per  $10^6$  PBMCs.

198

199 Quantitative cytokine assays

200 Quantitative ELISA for TNF $\alpha$  (Biolegend USA) and IL-2 (Mabtech, Sweden) were  
201 performed on ELISpot culture supernatants according to the manufacturer's instructions.

202

203 Statistical analysis

204 PRISM version 6 was used for statistical analysis. As the data were not normally distributed,  
205 differences in means were compared using the Mann-Whitney U test (two tailed). Spearman  
206 rank order correlation coefficient was used to evaluate the correlation between variables.

207

208

209

210

211

212

213

214 **Results**

215 Patient clinical and laboratory features

216 To investigate the role of T cells in the progression of dengue infection we stratified patients  
 217 based on disease severity. The clinical and laboratory features of the 74 patients recruited to  
 218 the study are shown in table 1. Of these 74 patients, 45 had DHF and 29 had DF, and all 45  
 219 patients with DHF had ascites with 10 of them also experiencing pleural effusions. None of  
 220 the patients developed shock and only one person progressed to bleeding manifestations  
 221 (table 1). The median duration of illness when recruited to the study was similar for patients  
 222 with DF (median 5, IQR 5 to 6 days) and DHF (median 5, IQR 4 to 6 days).

223

| <b>Clinical findings</b>      | <b>DHF (n= 45)</b> | <b>DF (n= 29)</b> |
|-------------------------------|--------------------|-------------------|
| Vomiting                      | 15 (33.33%)        | 8 (27.59%)        |
| Abdominal pain                | 25 (55.56%)        | 7 (24.14%)        |
| Hepatomegaly                  | 10 (22.22%)        | 2 (6.9%)          |
| Bleeding manifestations       | 1 (2.22%)          | 0                 |
| Pleural effusion              | 10 (22.22%)        | 0                 |
| Ascites                       | 45 (100%)          | 0                 |
| Lowest platelet count         |                    |                   |
| <20,000 cells/mm <sup>3</sup> | 25 (55.56%)        | 1 (3.45%)         |
| 20,000 to 50,000              | 13 (28.89%)        | 10 (34.48%)       |
| 50,000-100,000                | 6 (13.33%)         | 12(41.38%)        |
| >100,000                      | 1 (2.22%)          | 6 (20.69%)        |

|                         |                     |                            |
|-------------------------|---------------------|----------------------------|
| Lowest Lymphocyte count |                     |                            |
| <750                    | 20 (44.44%)         | 7 (24.14%)                 |
| 750 – 1500              | 20 (44.44%)         | 20(68.97%)                 |
| >1500                   | 5 (11.11%)          | 2 (6.90%)                  |
| Infecting serotype      |                     |                            |
| DENV1                   | 14 (31.1)           | 16 (55.2)                  |
| DENV2                   | 15 (33.3)           | 4 (13.8)                   |
| DENV3                   | 3 (6.7)             | 1 (3.4)                    |
| DENV4                   | 2 (4.4)             | 0 (0)                      |
| Aviraemia               | 11 (24.4)           | 8 (27.5)                   |
| Highest AST (IU/L)      |                     |                            |
| Median (IQR)            | 133.6 (86 to 366.1) | Median 72.5, IQR 55 to 183 |
| Highest ALT (IU/L)      |                     |                            |
| Median (IQR)            | 172 ( 81 to 291)    | 90 (30.3 to 96)            |

224

225 **Table 1: Clinical and laboratory characteristics of patients with DHF and DF**

226

227 Ex vivo IFN $\gamma$  responses in patients with acute dengue infection

228 To evaluate the role of T cell derived cytokine in the immunopathology or regulation of acute

229 dengue infection, we stimulated PBMCs isolated from patients with either DF or DHF with

230 peptides constituting DENV-derived non-structural protein (NS) and assessed cytokine

231 production by ELISPOT. We stimulated the patient PBMCs with different pools of

232 overlapping peptides making up either full length NS1, NS3 or NS5 protein, or a pool of total  
233 NS1, 3 and 5 peptides (DENV-all). NS3 and NS5 were selected for investigation as CD8+ T  
234 cell responses have been shown to be directed to these proteins and CD4+ T cells have been  
235 shown to target structural proteins and NS1 as the main non-structural protein[11, 21]. This  
236 combination of NS proteins from the particular DENV strains has previously been used to  
237 study DENV specific T cell responses [32]. We used this ex vivo ELISPOT method to model  
238 antigen presentation of dengue-derived peptides to antigen-specific T cells in vitro and  
239 assessed T cell activation by IFN $\gamma$  production, as a representative cytokine produced by T  
240 cells during dengue infection. T cell responses to the pooled DENV peptides (DENV-ALL)  
241 ( $p=0.02$ ) were higher in PBMCs derived from patients with DF than DHF patients and the  
242 NS3-specific responses showed a trend to be higher in those with DF than DHF (Fig. 1A). T  
243 cell responses to DENV-NS1 peptides were similar in patients with DF and DHF. We did  
244 not detect TNF $\alpha$  in the ex vivo ELISpot culture supernatants, which is in contrast to studies  
245 performed by others on T cell clones that implied TNF $\alpha$  producing DENV-specific T cells  
246 contribute to disease pathogenesis [15]. We also did not detect significant quantities of IL-2.  
247

248 **Figure 1: Ex vivo ELISpot responses to DENV peptides in patients with DHF and DF.**

249 (A) Ex vivo IFN $\gamma$  ELISpot responses to DENV NS1, NS3, NS5 and combined DENV  
250 overlapping peptides in patients with DF (n=29) and DHF (n=45). (B) Ex vivo IFN $\gamma$  ELISpot  
251 responses to DENV peptides in patients who were recruited on day 4 since onset of illness  
252 with DF (n=6) and DHF (n=12). Error bars represent the median and the interquartile range.  
253 \* $P<0.05$ .

254

255 To assess if detection of DENV specific T cell responses before the onset of the critical phase  
256 (vascular leakage phase), was associated with a reduced likelihood of developing leakage,

257 we isolated the data from DF and DHF patients recruited on day 4 post the onset of illness  
258 and analysed IFN $\gamma$  production by peptide stimulated PBMCs. None of the patients had  
259 evidence of vascular leakage on day 4 of illness and those who developed leakage (patients  
260 with DHF), did so on day 5 or 6. DF patients had a significantly higher IFN $\gamma$  secretion  
261 response ( $p=0.02$ ) to the DENV-all peptide pool (median 42.5, IQR=22.5 to 945 SFU/10<sup>6</sup>  
262 PBMCs), when compared to DHF patients (median 0, IQR=0 to 12.5 SFU/10<sup>6</sup> PBMCs) (Fig  
263 1B). As such, significantly higher DENV-specific T cell responses were seen in those who  
264 did not develop fluid leakage, and those who had lower DENV-specific T cell responses  
265 proceeded to develop fluid leakage (DHF). Responses to DENV-NS3, NS1 and NS5 also  
266 appeared higher in patients with DF at this time point, although this did not reach statistical  
267 significance (Fig. 1B).

268

269 To further assess the time-course of the response we obtained a second blood sample from  
270 eight patients within our cohort two days after collection of the first sample. T cell responses  
271 to DENV-ALL and DENV-NS3 peptides increased from the first sample (day 4) to the  
272 second (day 6), but it was not statistically significant ( $p>0.05$ ) (Supplementary fig. 1)

273

#### 274 Laboratory parameters and DENV-specific T cell responses

275 Thrombocytopenia is associated with clinical disease severity and higher degrees of  
276 thrombocytopenia are seen in those with DHF compared to those with DF[24]. We found  
277 that DENV peptide specific T cell responses inversely correlated with the degree of  
278 thrombocytopenia. While this inverse correlation with T cell responses and platelet counts  
279 was significant for DENV-NS1 (Spearman's  $r=0.26$ ,  $p=0.01$ ) (Fig 2A), NS5 (Spearman's  
280  $r=0.4$ ,  $p=0.0002$ ) (Fig 2B) and DENV-All (Spearman's  $r=0.31$ ,  $p=0.005$ ) (Fig 2C), it was not  
281 significant for NS3 (Spearman's  $r=0.18$ ,  $p=0.09$ ) (Fig 2D). No association was seen with

282 DENV-peptide specific T cell responses and aspartate transaminase (AST) and alanine  
283 transaminase (ALT) (Supplementary fig 2), which are indicators of liver dysfunction [28,  
284 33].

285

286 **Figure 2: Relationship between laboratory parameters and DENV specific T cells in**  
287 **patients with acute dengue**

288 Platelet counts were correlated with ex vivo IFN $\gamma$  ELISpot responses to DENV NS1  
289 (Spearman's  $r=0.26$ ,  $p=0.01$ ) (A), NS5 (Spearman's  $r=0.4$ ,  $p=0.0002$ ) (B) and the overall  
290 DENV (Spearman's  $r=0.31$ ,  $p=0.005$ ) (C) and NS3 (Spearman's  $r=0.18$ ,  $p=0.09$ ) (D)  
291 overlapping peptides in patients ( $n=74$ ).

292

293 The relationship between DENV serotype and T cell responses

294 While some studies report that certain DENV serotypes associate with DHF [34, 35], others  
295 have shown that the risk of DHF is similar regardless of serotype [36]. Therefore, we  
296 proceeded to determine whether there were differences in the T cell responses to DENV-  
297 proteins based on the viral serotype that the patients were infected with. Within our cohort  
298 30 (40.5%) patients were infected with DENV1, 19 (25.7%) with DENV2, 4 (5.4%) with  
299 DENV-3 and 2 (2.7%) with DENV-4 (Table 1). The serotype could not be determined in 19  
300 (25.7%) patients, as they were not viraemic at the time of recruitment. DHF developed in  
301 14/30 (46.7%) of the patients infected with DENV-1 and 15/19 (78.9%) of those infected  
302 with the DENV-2 and in 11/19 (57.9%) who were aviraemic at the time of recruitment (Fig  
303 3A). Thus, it appeared as if DENV-2 infection was more likely to lead to development of  
304 DHF (odds ratio 3.3, 95% CI 0.93 to 12.1), however the association was not statistically  
305 significant ( $p=0.08$ ) in this cohort. Aviraemic individuals displayed significantly higher IFN $\gamma$   
306 T cell responses to NS1 ( $p=0.002$ ), NS3 ( $p=0.02$ ), NS5 ( $p=0.02$ ) and DENV-ALL pooled

307 peptides ( $p=0.0004$ ) when compared to those who were viraemic at the time of recruitment  
308 (Fig 3B). In addition, those who were infected with the DENV-2 serotype, with a trend  
309 towards increased DHF susceptibility, had significantly lower responses to NS1 ( $p=0.002$ ),  
310 NS3 ( $p=0.04$ ), NS5 ( $p=0.003$ ) and DENV-All ( $p=0.0003$ ) peptides when compared to those  
311 who were infected with DENV-1.

312

313 Multiple alignment of the NS5 protein sequences of DENV2 (58 sequences) and DENV3 (28  
314 sequences) was performed using virus variation resource [37] and analysed using Clustal  
315 omega and showed a sequence identity of  $> 72.1\%$  between the NS5 proteins of these viral  
316 serotypes [38]. Multiple alignment of the NS3 protein of DENV2 (61 sequences) and DENV3  
317 (28 sequences) showed a sequence identity of  $> 72.02\%$ . Multiple alignment of the NS1  
318 protein of DENV2 (62 sequences) and DENV3 (28 sequences) showed a sequence identity  
319 of  $>65.11\%$ . The homology between DENV1 and DEN2 NS5 was  $>71.83\%$  (comparison of  
320 102 DENV1 sequences and 58 DENV2 sequences) [37], while the homology between  
321 DENV1 and DENV3 NS3 was  $>76.9\%$  (comparison of 102 DENV1 sequences and 28  
322 DENV3 sequences) [37]. Therefore, the differential response to DENV serotype is unlikely  
323 to be profoundly influenced by a difference in NS1 and NS2 protein sequences.

324

325 **Figure 3: Relationship between DENV serotype, clinical disease severity, viraemia and**  
326 **T cell responses**

327 A: Proportion of patients, infected with DENV1 ( $n=30$ ), DENV2 ( $n=19$ ) or were aviraemic  
328 ( $n=19$ ) who developed DF or DHF.

329 B: Ex vivo ELISpot responses to DENV NS1, NS3, NS5 and combined DENV-ALL  
330 overlapping peptides in patients who were infected with DENV-1 ( $n=30$ ), DENV-2 ( $n=19$ )

331 or who were aviraemic (n=19). Error bars represent the median and the interquartile range.

332 \*\*P<0.05, \*\*P<0.01, \*\*\*P<0.001

333 (C) Correlation between DENV NS3-specific T cell responses and degree of viraemia

334 (Spearman's  $r = -0.47$ ,  $p=0.0003$ ).

335 (D) Ex vivo ELISpot responses to DENV NS1, NS3, NS5 and the overall DENV overlapping

336 peptides in patients who had primary dengue (P) (n=19) and secondary dengue infection (S)

337 (n=48)

338

339 Viraemia and DENV specific T cell responses

340 DHF patients have been shown to have higher viral loads, exhibit prolonged viraemia [39,

341 40] and persistent DENV-NS1 antigenaemia [41, 42]. As such we attempted to elucidate a

342 correlation between T cell cytokine responses and viremia. DENV specific T cell responses

343 to NS1, NS3 and NS5 peptides in addition to the pooled peptides (DENV-ALL) inversely

344 correlated with the degree of viraemia, which was most significant for DENV-NS3 specific

345 T cell responses (Spearman's  $r = -0.47$ ,  $p=0.0003$ ) (Fig. 3C and supplementary Fig 3). The

346 viral loads significantly inversely correlated with the platelet counts (Spearman's  $r=-0.34$ ,

347  $p=0.01$ ), with the platelet counts being lowest in individuals with the highest viral loads (data

348 not shown).

349

350 It is thought that a second dengue virus infection with a different viral serotype is a risk factor

351 for developing DHF[43]. To determine the effect of secondary infection on the resulting T

352 cell response, we characterized patient infection history and assayed patient blood for the

353 presence of dengue specific IgM and IgG. Primary infection was defined by DENV- specific

354 IgM:IgG >1.2 [24]. Accordingly, 19 (25.7 %) patients were classified as experiencing a

355 primary dengue infection and 48 (64.9%) were defined as secondary dengue infection. The



356 antibody results were inconclusive for 7 (9.4%) patients. Our results showed no significant  
357 difference in DENV specific T cell responses between primary and secondary dengue  
358 infection patient groups ( $p>0.05$ ) for any of the DENV peptide pools (Fig. 3D).

359

360 We semi-quantitatively determined the DENV-specific IgM and IgG antibody titres in all  
361 patients with DF and DHF, and we found that neither the DENV-IgM nor IgG antibody titres  
362 correlated with T cell responses to DENV-NS1, NS5 and NS3. However, the DENV-specific  
363 IgG antibody titres inversely correlated with viral loads in those with DHF (Spearman's  $r=-$   
364  $0.37$ ,  $p=0.03$ ) (Fig. 4A), but not in those with DF (Spearman's  $r=-0.25$ ,  $p=0.16$ ) (data not  
365 shown). In analysis of the IgG antibody titres of all patients ( $n=74$ ) they too inversely  
366 correlated with the degree of thrombocytopenia (Spearman's  $r=-0.29$ ,  $p=0.009$ ) (Fig. 4B).  
367 DENV-specific IgG also correlated with the highest aspartate transaminase (AST)  
368 (Spearman's  $r=0.51$ ,  $p=0.004$ ) (Fig. 4C) and alanine transaminase (ALT) levels (Spearman's  
369  $r=0.4$ ,  $p=0.03$ ) in all patients with acute dengue infection (Fig. 4D).

370

371 **Figure 4: DENV-specific IgG responses and laboratory parameters of clinical disease**  
372 **severity in patients with acute dengue**

373 Analysis of the correlation between DENV-specific IgG responses and (A) degree of  
374 viraemia (Spearman's  $r=-0.25$ ,  $p=0.16$ ) in patients with DHF, (B) degree of thrombocytopenia  
375 (Spearman's  $r=-0.29$ ,  $p=0.009$ ), (C) aspartate transaminase (AST) levels (Spearman's  $r=0.51$ ,  
376  $p=0.004$ ) and (D) alanine transaminase (ALT) levels (Spearman's  $r=0.51$ ,  $p=0.004$ ) in all  
377 patients ( $n=74$ ) with acute dengue infection

378

379

380

## 381 **Discussion**

382 In this study we set out to investigate the role of T cells in dengue immunity and found that  
383 DENV-specific T cells are present at low frequency during acute infection, consistent with  
384 previous reports published by us and by others [16, 17, 44]. IFN $\gamma$  production was  
385 significantly higher in patients with DF as opposed to DHF, especially during early infection.  
386 Patients who had higher DENV-NS3 specific T cell responses on day four since the onset of  
387 illness (before development of fluid leakage), were significantly more likely to develop DF  
388 than DHF. In addition, the frequency of pooled DENV-peptide specific, in particular DENV-  
389 NS3 specific, T cell responses was associated with resolution of viraemia. Aviraemic patients  
390 had significantly higher DENV- specific T cell responses when compared to those who were  
391 viraemic. T cell IFN $\gamma$  responses to DENV NS1, NS5 and pooled DENV (NS1, NS3 and NS5)  
392 peptides inversely correlated with the degree of thrombocytopenia, but we did not show any  
393 relationship with liver transaminases (AST and ALT levels). Both the degree of  
394 thrombocytopenia and a rise in both AST and ALT, have been shown to associate with  
395 dengue severity [24, 28]. Therefore, our data show that the early appearance of DENV-NS3  
396 specific T cell responses is associated with milder disease, which is compatible with recent  
397 studies regarding the role of T cells in DENV infection [18, 21-23]. This suggests that  
398 DENV-peptide specific T cells are protective against developing severe forms of dengue  
399 infection.

400

401 Although Appana et al also evaluated *ex vivo* IFN $\gamma$  to selected peptides of structural and non-  
402 structural DENV proteins by ELISpot assays, they did not find any differences in the  
403 frequency of DENV-specific T cell responses in patients with DF when compared to those  
404 with DHF [45]. However, only peptides that were predicted to bind to certain major HLA  
405 alleles were included in the authors' peptide pools used in the ELISpot assays [45], whereas

406 here we utilised peptides spanning the entire length of DENV NS1, NS3 and NS5, proteins.  
407 This difference in experimental approach may have affected the cytokine production profile  
408 of the responding T cells in the different disease states. In addition, as the viability and  
409 function of T cells have been shown to be affected in those with acute dengue infection [46],  
410 we used freshly isolated PBMCs in all our experiments to limit extraneous cellular stress in  
411 contrast to previous studies [15, 21, 45, 47].

412

413 In general, more severe forms of dengue infection are observed during a secondary  
414 heterologous dengue infection [4], which gave rise to the hypothesis that cross reactive T  
415 cells responding to the primary infecting DENV serotype are suboptimal in clearing the  
416 secondary virus, and lead to development of more severe disease [14, 16]. In these studies, it  
417 was shown that a tetramer of different viral specificity to the current infecting DENV  
418 serotype, sometimes had a higher affinity to the DENV specific T cells [16]. In our study, we  
419 did not observe any difference in IFN $\gamma$  production in overall *ex vivo* ELISpot assays from  
420 PBMCs derived from patients with primary or secondary dengue infection; however, we did  
421 not examine variant peptide-specific responses. The broad differences we observed in  
422 DENV-specific T cell responses correlated only with clinical disease severity. Interestingly,  
423 the DENV-specific IgG levels, which were measured semi-quantitatively, inversely  
424 correlated with the degree of thrombocytopenia and also AST and ALT levels, which are  
425 known to associate with liver damage. DENV-specific IgG levels are known to be  
426 significantly higher in patients with secondary dengue, compared to primary dengue, indeed  
427 it is one of the criteria for definition of a secondary dengue infection. Therefore, our data  
428 show that antibodies may contribute to severe disease, particularly during secondary dengue  
429 infection.

430

431 In summary, we found that DENV-specific T cell IFN $\gamma$  responses, were associated with  
432 milder clinical disease severity and resolution of viraemia, suggesting a protective role for  
433 peptide specific T cells early in acute dengue infection.

434

435

436

437

438

439

440

441

442

443

444

445

446

447

448

449

450

451

452

453

454

455

456 **References**

- 457 1. Guzman MG, Gubler DJ, Izquierdo A, Martinez E, Halstead SB. Dengue infection.  
458 Nat Rev Dis Primers. 2016;2:16055. doi: 10.1038/nrdp.2016.55. PubMed PMID: 27534439.
- 459 2. Bhatt S, Gething PW, Brady OJ, Messina JP, Farlow AW, Moyes CL, et al. The  
460 global distribution and burden of dengue. Nature. 2013;496(7446):504-7. Epub 2013/04/09.  
461 doi: 10.1038/nature12060. PubMed PMID: 23563266; PubMed Central PMCID:  
462 PMC3651993.
- 463 3. Malavige GN, Ogg GS. T cell responses in dengue viral infections. J Clin Virol.  
464 2013;58(4):605-11. Epub 2013/11/14. doi: 10.1016/j.jcv.2013.10.023. PubMed PMID:  
465 24220605.
- 466 4. Katzelnick LC, Harris E, Participants in the Summit on Dengue Immune Correlates  
467 of P. Immune correlates of protection for dengue: State of the art and research agenda.  
468 Vaccine. 2017;35(36):4659-69. doi: 10.1016/j.vaccine.2017.07.045. PubMed PMID:  
469 28757058; PubMed Central PMCID: PMCPMC5924688.
- 470 5. Halstead SB, Russell PK. Protective and immunological behavior of chimeric yellow  
471 fever dengue vaccine. Vaccine. 2016;34(14):1643-7. doi: 10.1016/j.vaccine.2016.02.004.  
472 PubMed PMID: 26873054.
- 473 6. Simmons CP, McPherson K, Van Vinh Chau N, Hoai Tam DT, Young P, Mackenzie  
474 J, et al. Recent advances in dengue pathogenesis and clinical management. Vaccine.  
475 2015;33(50):7061-8. doi: 10.1016/j.vaccine.2015.09.103. PubMed PMID: 26458808.
- 476 7. Rivino L. T cell immunity to dengue virus and implications for vaccine design. Expert  
477 review of vaccines. 2016;15(4):443-53. doi: 10.1586/14760584.2016.1116948. PubMed  
478 PMID: 26560171.

- 479 8. Screaton G, Mongkolsapaya J, Yacoub S, Roberts C. New insights into the  
480 immunopathology and control of dengue virus infection. *Nature reviews Immunology*.  
481 2015;15(12):745-59. doi: 10.1038/nri3916. PubMed PMID: 26603900.
- 482 9. Simmons CP, Dong T, Chau NV, Dung NT, Chau TN, Thao le TT, et al. Early T-cell  
483 responses to dengue virus epitopes in Vietnamese adults with secondary dengue virus  
484 infections. *Journal of virology*. 2005;79(9):5665-75. PubMed PMID: 15827181.
- 485 10. Duangchinda T, Dejnirattisai W, Vasanawathana S, Limpitikul W,  
486 Tangthawornchaikul N, Malasit P, et al. Immunodominant T-cell responses to dengue virus  
487 NS3 are associated with DHF. *Proceedings of the National Academy of Sciences of the*  
488 *United States of America*. 2010;107(39):16922-7. doi: 10.1073/pnas.1010867107. PubMed  
489 PMID: 20837518; PubMed Central PMCID: PMC2947904.
- 490 11. Rivino L, Kumaran EA, Jovanovic V, Nadua K, Teo EW, Pang SW, et al. Differential  
491 targeting of viral components by CD4+ versus CD8+ T lymphocytes in dengue virus  
492 infection. *Journal of virology*. 2013;87(5):2693-706. Epub 2012/12/21. doi:  
493 10.1128/JVI.02675-12. PubMed PMID: 23255803; PubMed Central PMCID: PMC3571409.
- 494 12. Duangchinda T, Dejnirattisai W, Vasanawathana S, Limpitikul W,  
495 Tangthawornchaikul N, Malasit P, et al. Immunodominant T-cell responses to dengue virus  
496 NS3 are associated with DHF. *Proceedings of the National Academy of Sciences of the*  
497 *United States of America*. 2011;107(39):16922-7. PubMed PMID: 20837518.
- 498 13. Midgley CM, Bajwa-Joseph M, Vasanawathana S, Limpitikul W, Wills B, Flanagan  
499 A, et al. An in-depth analysis of original antigenic sin in dengue virus infection. *Journal of*  
500 *virology*. 2011;85(1):410-21. Epub 2010/10/29. doi: 10.1128/JVI.01826-10. PubMed PMID:  
501 20980526; PubMed Central PMCID: PMC3014204.

- 502 14. Mongkolsapaya J, Dejnirattisai W, Xu XN, Vasanawathana S, Tangthawornchaikul  
503 N, Chairunsri A, et al. Original antigenic sin and apoptosis in the pathogenesis of dengue  
504 hemorrhagic fever. *Nature medicine*. 2003;9(7):921-7. PubMed PMID: 12808447.
- 505 15. Dong T, Moran E, Vinh Chau N, Simmons C, Luhn K, Peng Y, et al. High pro-  
506 inflammatory cytokine secretion and loss of high avidity cross-reactive cytotoxic T-cells  
507 during the course of secondary dengue virus infection. *PloS one*. 2007;2(12):e1192. PubMed  
508 PMID: 18060049.
- 509 16. Mongkolsapaya J, Duangchinda T, Dejnirattisai W, Vasanawathana S, Avirutnan P,  
510 Jairungsri A, et al. T cell responses in dengue hemorrhagic fever: are cross-reactive T cells  
511 suboptimal? *J Immunol*. 2006;176(6):3821-9. PubMed PMID: 16517753.
- 512 17. Malavige GN, Jeewandara C, Alles KM, Salimi M, Gomes L, Kamaladasa A, et al.  
513 Suppression of virus specific immune responses by IL-10 in acute dengue infection. *PLoS*  
514 *neglected tropical diseases*. 2013;7(9):e2409. Epub 2013/09/17. doi:  
515 10.1371/journal.pntd.0002409. PubMed PMID: 24040431; PubMed Central PMCID:  
516 PMC3764236.
- 517 18. Rivino L, Kumaran EA, Thein TL, Too CT, Gan VC, Hanson BJ, et al. Virus-specific  
518 T lymphocytes home to the skin during natural dengue infection. *Science translational*  
519 *medicine*. 2015;7(278):278ra35. doi: 10.1126/scitranslmed.aaa0526. PubMed PMID:  
520 25761891.
- 521 19. Amorim JH, dos Santos Alves RP, Bizerra R, Araujo Pereira S, Ramos Pereira L,  
522 Nascimento Fabris DL, et al. Antibodies are not required to a protective immune response  
523 against dengue virus elicited in a mouse encephalitis model. *Virology*. 2016;487:41-9. doi:  
524 10.1016/j.virol.2015.10.006. PubMed PMID: 26496698.

- 525 20. Yauch LE, Zellweger RM, Kotturi MF, Qutubuddin A, Sidney J, Peters B, et al. A  
526 protective role for dengue virus-specific CD8+ T cells. *J Immunol.* 2009;182(8):4865-73.  
527 PubMed PMID: 19342665.
- 528 21. Weiskopf D, Angelo MA, de Azeredo EL, Sidney J, Greenbaum JA, Fernando AN,  
529 et al. Comprehensive analysis of dengue virus-specific responses supports an HLA-linked  
530 protective role for CD8+ T cells. *Proceedings of the National Academy of Sciences of the*  
531 *United States of America.* 2013;110(22):E2046-53. Epub 2013/04/13. doi:  
532 10.1073/pnas.1305227110. PubMed PMID: 23580623; PubMed Central PMCID:  
533 PMC3670335.
- 534 22. Jeewandara C, Adikari TN, Gomes L, Fernando S, Fernando RH, Perera MK, et al.  
535 Functionality of dengue virus specific memory T cell responses in individuals who were  
536 hospitalized or who had mild or subclinical dengue infection. *PLoS neglected tropical*  
537 *diseases.* 2015;9(4):e0003673. Epub 2015/04/16. doi: 10.1371/journal.pntd.0003673.  
538 PubMed PMID: 25875020; PubMed Central PMCID: PMC4395258.
- 539 23. Weiskopf D, Bangs DJ, Sidney J, Kolla RV, De Silva AD, de Silva AM, et al. Dengue  
540 virus infection elicits highly polarized CX3CR1+ cytotoxic CD4+ T cells associated with  
541 protective immunity. *Proceedings of the National Academy of Sciences of the United States*  
542 *of America.* 2015;112(31):E4256-63. doi: 10.1073/pnas.1505956112. PubMed PMID:  
543 26195744.
- 544 24. WHO, editor. *Comprehensive guidelines for prevention and control of dengue fever*  
545 *and dengue haemorrhagic fever.* SEARO, New Delhi, India: World Health Organization;  
546 2011.
- 547 25. Vaughn DW, Nisalak A, Solomon T, Kalayanarooj S, Nguyen MD, Kneen R, et al.  
548 Rapid serologic diagnosis of dengue virus infection using a commercial capture ELISA that



- 549 distinguishes primary and secondary infections. The American journal of tropical medicine  
550 and hygiene. 1999;60(4):693-8. PubMed PMID: 10348250.
- 551 26. Sang CT, Cuzzubbo AJ, Devine PL. Evaluation of a commercial capture enzyme-  
552 linked immunosorbent assay for detection of immunoglobulin M and G antibodies produced  
553 during dengue infection. Clinical and diagnostic laboratory immunology. 1998;5(1):7-10.  
554 Epub 1998/02/10. PubMed PMID: 9455871; PubMed Central PMCID: PMC121382.
- 555 27. Dengue guidelines for diagnosis, prevention and control, (2009).
- 556 28. Fernando S, Wijewickrama A, Gomes L, Punchihewa CT, Madusanka SD,  
557 Dissanayake H, et al. Patterns and causes of liver involvement in acute dengue infection.  
558 BMC infectious diseases. 2016;16:319. doi: 10.1186/s12879-016-1656-2. PubMed PMID:  
559 27391896; PubMed Central PMCID: PMCPMC4938910.
- 560 29. Santiago GA, Vergne E, Quiles Y, Cosme J, Vazquez J, Medina JF, et al. Analytical  
561 and clinical performance of the CDC real time RT-PCR assay for detection and typing of  
562 dengue virus. PLoS neglected tropical diseases. 2013;7(7):e2311. doi:  
563 10.1371/journal.pntd.0002311. PubMed PMID: 23875046; PubMed Central PMCID:  
564 PMCPMC3708876.
- 565 30. Malavige GN, McGowan S, Atukorale V, Salimi M, Peelowatta M, Fernando N, et  
566 al. Identification of serotype-specific T cell responses to highly conserved regions of the  
567 dengue viruses. Clinical and experimental immunology. 2012;168(2):215-23. PubMed  
568 PMID: 22471283.
- 569 31. Malavige GN, Jones L, Kamaladasa SD, Wijewickrama A, Seneviratne SL, Black  
570 AP, et al. Viral load, clinical disease severity and cellular immune responses in primary  
571 varicella zoster virus infection in Sri Lanka. PloS one. 2008;3(11):e3789. PubMed PMID:  
572 19023425.

- 573 32. Chu H, George SL, Stinchcomb DT, Osorio JE, Partidos CD. CD8+ T-cell Responses  
574 in Flavivirus-Naive Individuals Following Immunization with a Live-Attenuated Tetravalent  
575 Dengue Vaccine Candidate. *The Journal of infectious diseases*. 2015;212(10):1618-28. doi:  
576 10.1093/infdis/jiv258. PubMed PMID: 25943203; PubMed Central PMCID:  
577 PMCPMC4621245.
- 578 33. Huy NT, Van Giang T, Thuy DH, Kikuchi M, Hien TT, Zamora J, et al. Factors  
579 associated with dengue shock syndrome: a systematic review and meta-analysis. *PLoS*  
580 *neglected tropical diseases*. 2013;7(9):e2412. Epub 2013/10/03. doi:  
581 10.1371/journal.pntd.0002412. PubMed PMID: 24086778; PubMed Central PMCID:  
582 PMC3784477.
- 583 34. Fried JR, Gibbons RV, Kalayanarooj S, Thomas SJ, Srikiatkachorn A, Yoon IK, et  
584 al. Serotype-specific differences in the risk of dengue hemorrhagic fever: an analysis of data  
585 collected in Bangkok, Thailand from 1994 to 2006. *PLoS neglected tropical diseases*.  
586 2010;4(3):e617. doi: 10.1371/journal.pntd.0000617. PubMed PMID: 20209155; PubMed  
587 Central PMCID: PMCPMC2830471.
- 588 35. Yung CF, Lee KS, Thein TL, Tan LK, Gan VC, Wong JG, et al. Dengue serotype-  
589 specific differences in clinical manifestation, laboratory parameters and risk of severe disease  
590 in adults, Singapore. *The American journal of tropical medicine and hygiene*.  
591 2015;92(5):999-1005. doi: 10.4269/ajtmh.14-0628. PubMed PMID: 25825386; PubMed  
592 Central PMCID: PMCPMC4426593.
- 593 36. Fox A, Le NM, Simmons CP, Wolbers M, Wertheim HF, Pham TK, et al.  
594 Immunological and viral determinants of dengue severity in hospitalized adults in Ha Noi,  
595 Viet Nam. *PLoS neglected tropical diseases*. 2011;5(3):e967. Epub 2011/03/11. doi:  
596 10.1371/journal.pntd.0000967. PubMed PMID: 21390156; PubMed Central PMCID:  
597 PMC3046970.

- 598 37. Brister JR, Bao Y, Zhdanov SA, Ostapchuck Y, Chetvernin V, Kiryutin B, et al. Virus  
599 Variation Resource--recent updates and future directions. *Nucleic Acids Res.*  
600 2014;42(Database issue):D660-5. doi: 10.1093/nar/gkt1268. PubMed PMID: 24304891;  
601 PubMed Central PMCID: PMC3965055.
- 602 38. Sievers F, Wilm A, Dineen D, Gibson TJ, Karplus K, Li W, et al. Fast, scalable  
603 generation of high-quality protein multiple sequence alignments using Clustal Omega. *Mol*  
604 *Syst Biol.* 2011;7:539. doi: 10.1038/msb.2011.75. PubMed PMID: 21988835; PubMed  
605 Central PMCID: PMC3261699.
- 606 39. Guilarde AO, Turchi MD, Siqueira JB, Jr., Feres VC, Rocha B, Levi JE, et al. Dengue  
607 and dengue hemorrhagic fever among adults: clinical outcomes related to viremia, serotypes,  
608 and antibody response. *The Journal of infectious diseases.* 2008;197(6):817-24. PubMed  
609 PMID: 18269315.
- 610 40. Wang WK, Chen HL, Yang CF, Hsieh SC, Juan CC, Chang SM, et al. Slower rates  
611 of clearance of viral load and virus-containing immune complexes in patients with dengue  
612 hemorrhagic fever. *Clin Infect Dis.* 2006;43(8):1023-30. PubMed PMID: 16983615.
- 613 41. Paranavitane SA, Gomes L, Kamaladasa A, Adikari TN, Wickramasinghe N,  
614 Jeewandara C, et al. Dengue NS1 antigen as a marker of severe clinical disease. *BMC*  
615 *infectious diseases.* 2014;14(1):570. Epub 2014/11/05. doi: 10.1186/s12879-014-0570-8.  
616 PubMed PMID: 25366086; PubMed Central PMCID: PMC4222370.
- 617 42. Adikari TN, Gomes L, Wickramasinghe N, Salimi M, Wijesiriwardana N,  
618 Kamaladasa A, et al. Dengue NS1 antigen contributes to disease severity by inducing  
619 interleukin (IL)-10 by monocytes. *Clinical and experimental immunology.* 2016;184(1):90-  
620 100. doi: 10.1111/cei.12747. PubMed PMID: 26621477; PubMed Central PMCID:  
621 PMC4778103.

- 622 43. Guzman MG, Alvarez M, Halstead SB. Secondary infection as a risk factor for  
623 dengue hemorrhagic fever/dengue shock syndrome: an historical perspective and role of  
624 antibody-dependent enhancement of infection. *Archives of virology*. 2013;158(7):1445-59.  
625 Epub 2013/03/09. doi: 10.1007/s00705-013-1645-3. PubMed PMID: 23471635.
- 626 44. Chandele A, Sewatanon J, Gunisetty S, Singla M, Onlamoon N, Akondy RS, et al.  
627 Characterization of human CD8 T cell responses in dengue virus infected patients from India.  
628 *Journal of virology*. 2016. doi: 10.1128/JVI.01424-16. PubMed PMID: 27707928.
- 629 45. Appanna R, Huat TL, See LL, Tan PL, Vadivelu J, Devi S. Cross-reactive T-cell  
630 responses to the nonstructural regions of dengue viruses among dengue fever and dengue  
631 hemorrhagic fever patients in Malaysia. *Clin Vaccine Immunol*. 2007;14(8):969-77. PubMed  
632 PMID: 17567768.
- 633 46. Perdomo-Celis F, Salgado DM, Castaneda DM, Narvaez CF. Viability and  
634 functionality of Cryopreserved Peripheral Blood Mononuclear Cells in pediatric dengue. *Clin  
635 Vaccine Immunol*. 2016. doi: 10.1128/CVI.00038-16. PubMed PMID: 26961858; PubMed  
636 Central PMCID: PMC4860468.
- 637 47. Luhn K, Simmons CP, Moran E, Dung NT, Chau TN, Quyen NT, et al. Increased  
638 frequencies of CD4+ CD25(high) regulatory T cells in acute dengue infection. *The Journal  
639 of experimental medicine*. 2007;204(5):979-85. PubMed PMID: 17452519.
- 640  
641  
642  
643  
644  
645  
646

647 **Supporting information captions**

648 **Supplementary figure 1:** Frequency of DENV specific NS1, NS3, NS5 and All overlapping  
649 peptide responses in patients with acute dengue (n=8) on day 4 and day 6 of illness.

650

651 **Supplementary figure 2:** Association of DENV specific NS1, NS3, NS5 and All  
652 overlapping peptide responses in patients with acute dengue (n=74) with the highest recorded  
653 aspartate transaminase level (NS1 Spearman's  $r=0.15$ ,  $p=0.4$ ; NS3 Spearman's  $r=0.34$ ,  
654  $p=0.05$ ; NS5 Spearman's  $r=0.16$ ,  $p=0.37$ ; All Spearman's  $r=0.33$ ,  $p=0.06$ ) (A) and alanine  
655 transaminase level (NS1 Spearman's  $r=0.12$ ,  $p=0.5$ ; NS3 Spearman's  $r=0.25$ ,  $p=0.15$ ; NS5  
656 Spearman's  $r=0.19$ ,  $p=0.29$ ; All Spearman's  $r=0.31$ ,  $p=0.08$ ) (B)

657

658 **Supplementary figure 3: Relationship between viraemia and DENV T cell responses**

659 (A) Correlation between DENV All-Specific T cell responses and degree of viraemia  
660 (Spearman's  $r = -0.38$ ,  $p=0.004$ ).

661 (B) Correlation between DENV NS5-Specific T cell responses and degree of viraemia  
662 (Spearman's  $r = -0.28$ ,  $p=0.04$ ).

663 (C) Correlation between DENV NS1-Specific T cell responses and degree of viraemia  
664 (Spearman's  $r = -0.31$ ,  $p=0.02$ ).

665

666

667

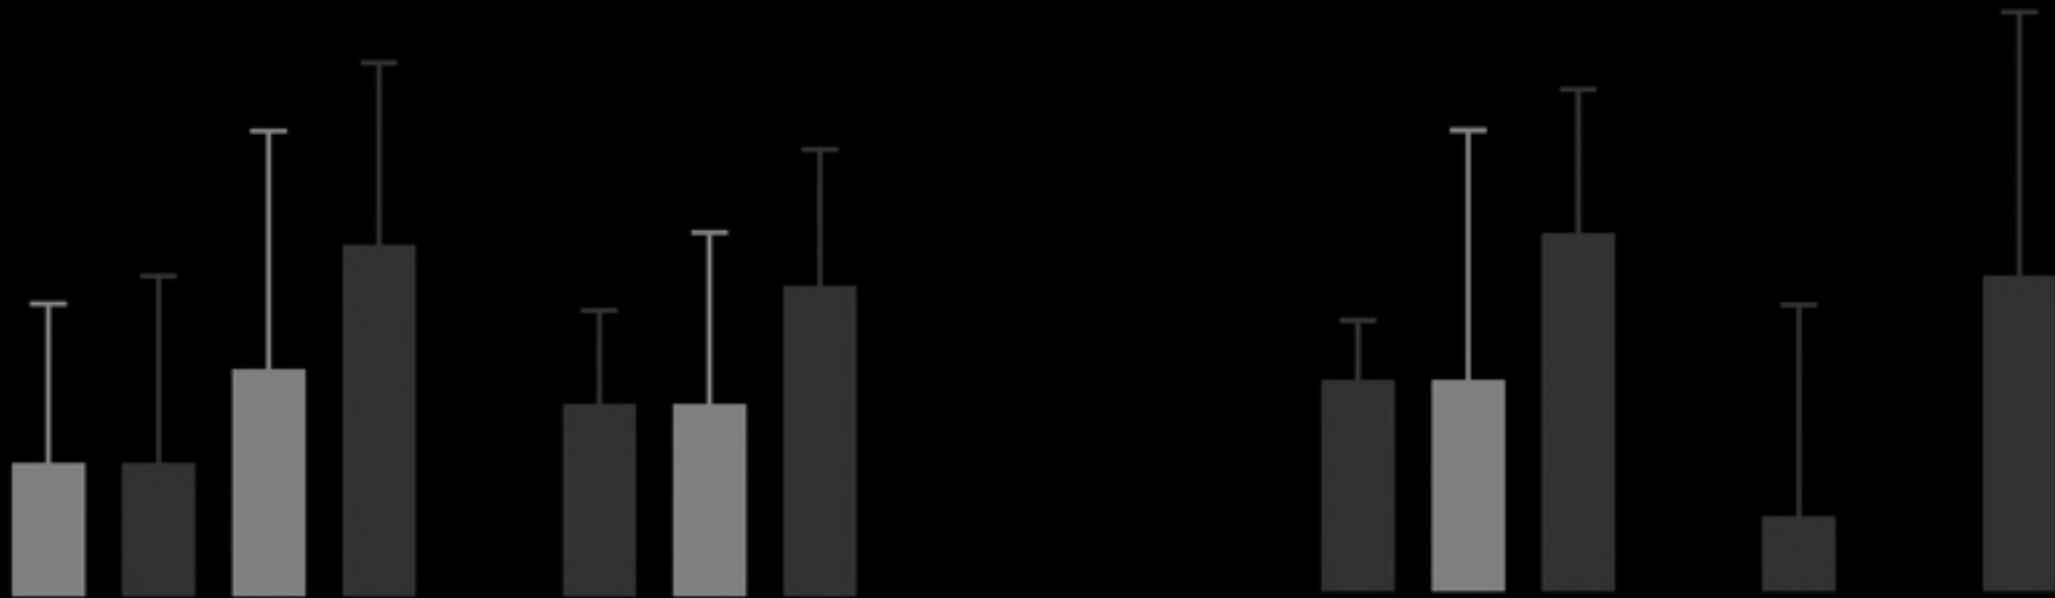

**A**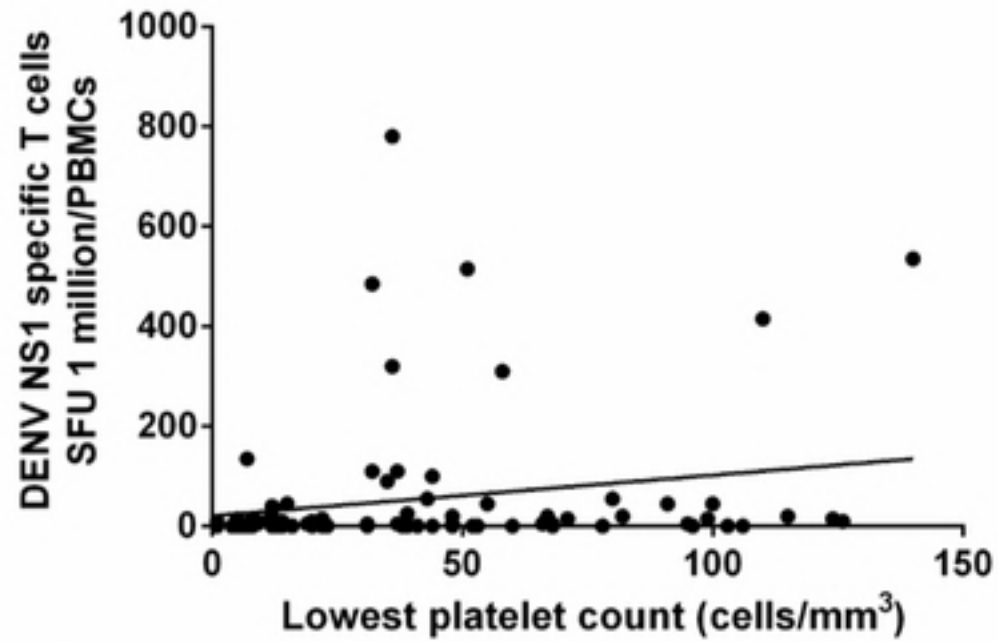**B**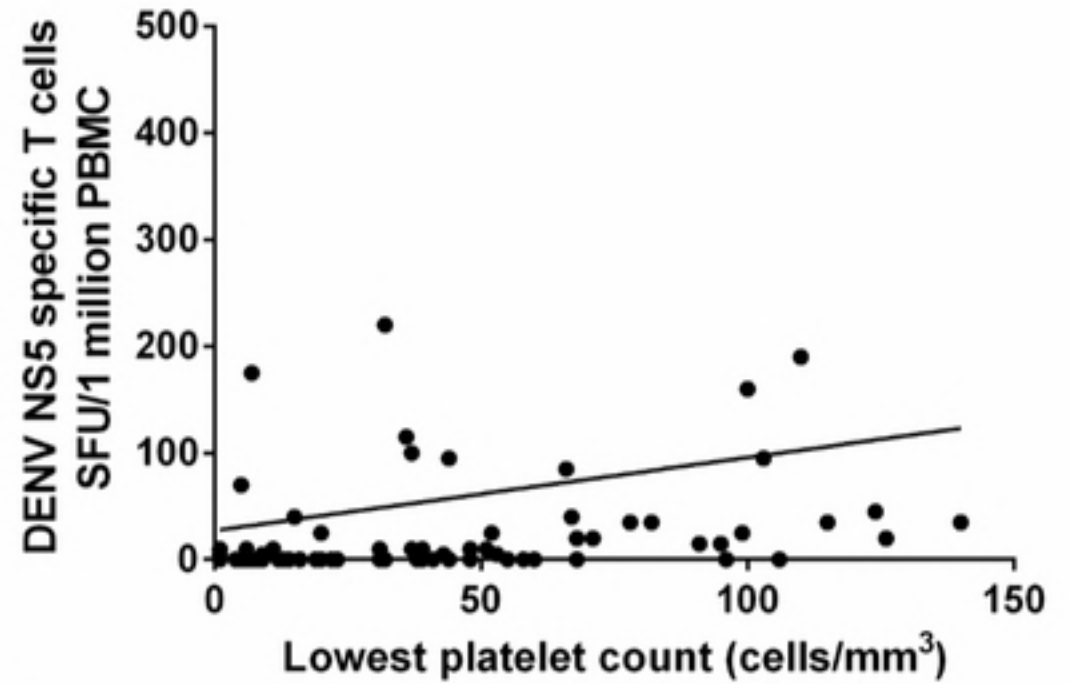**C**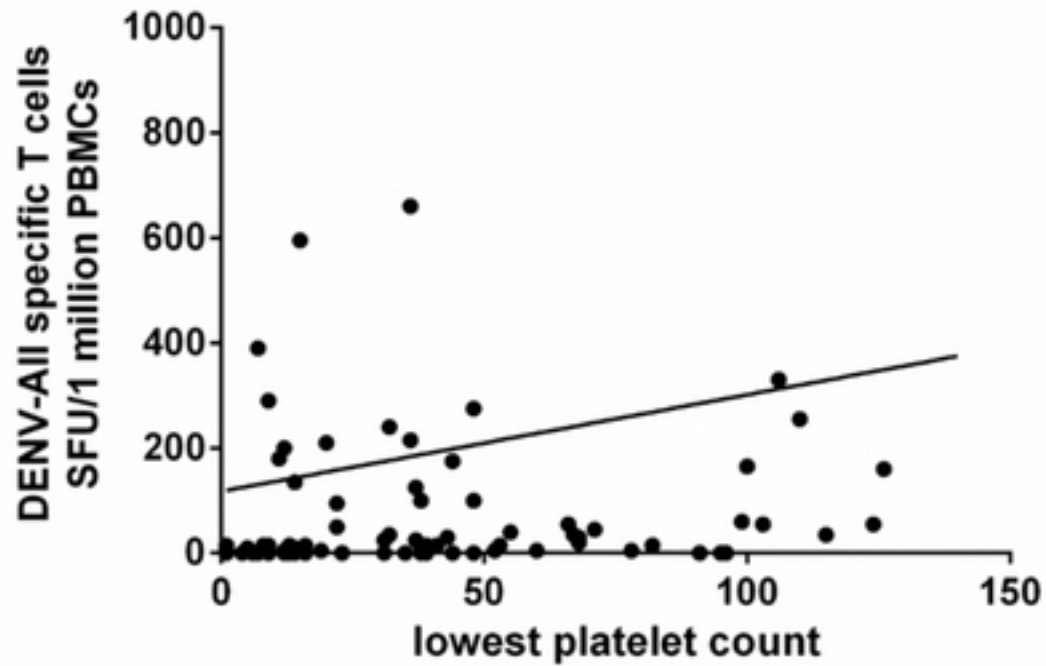**D**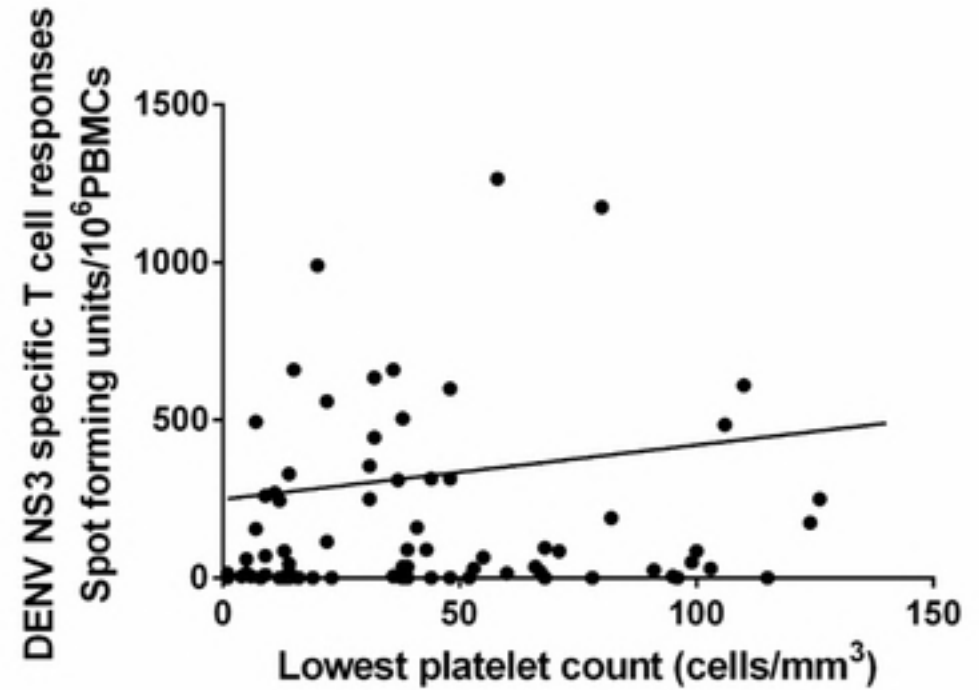

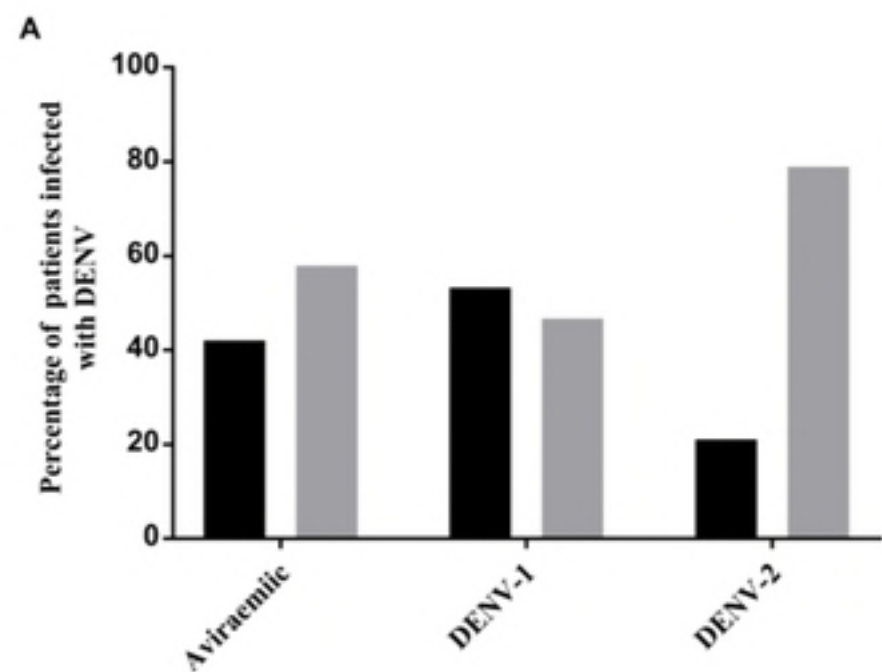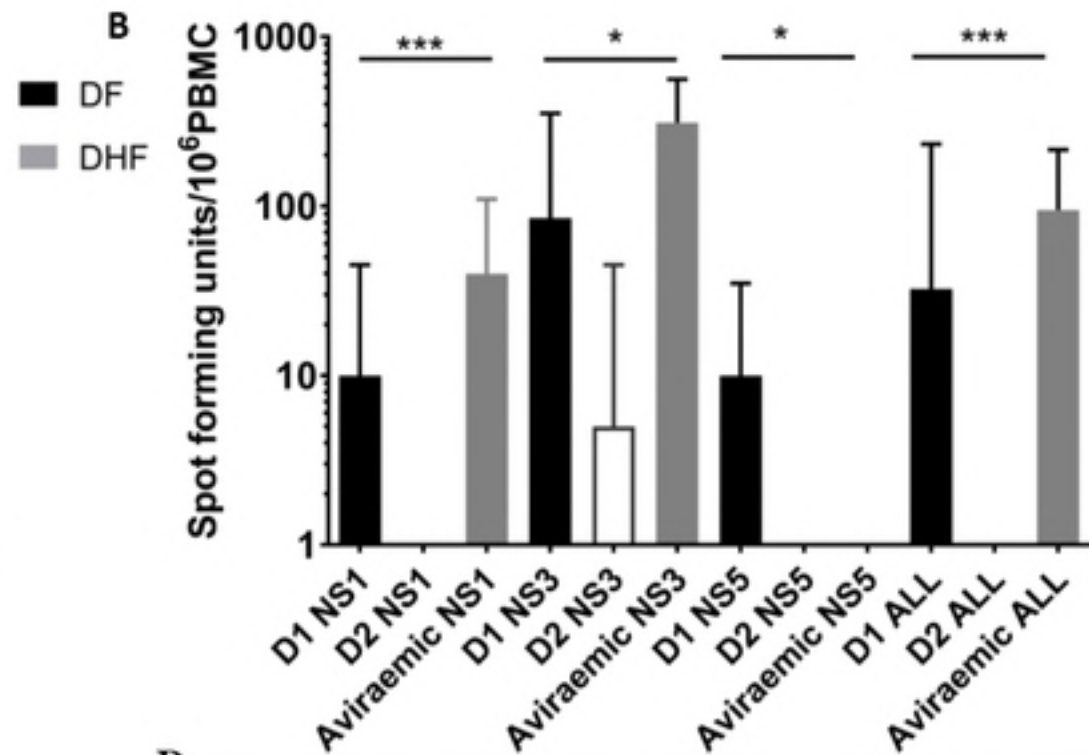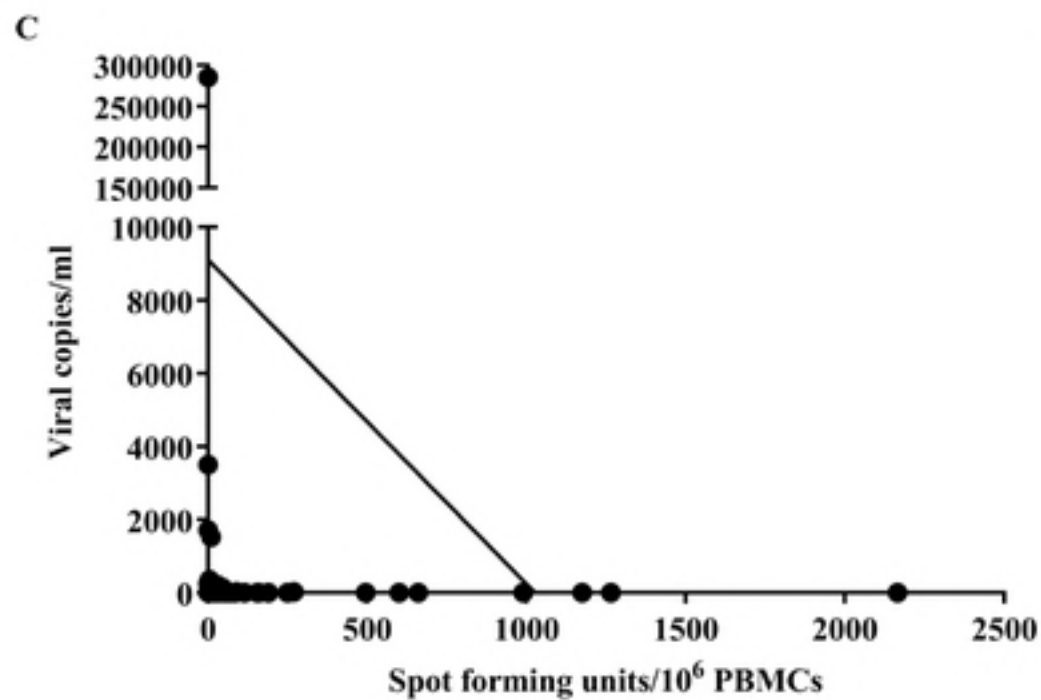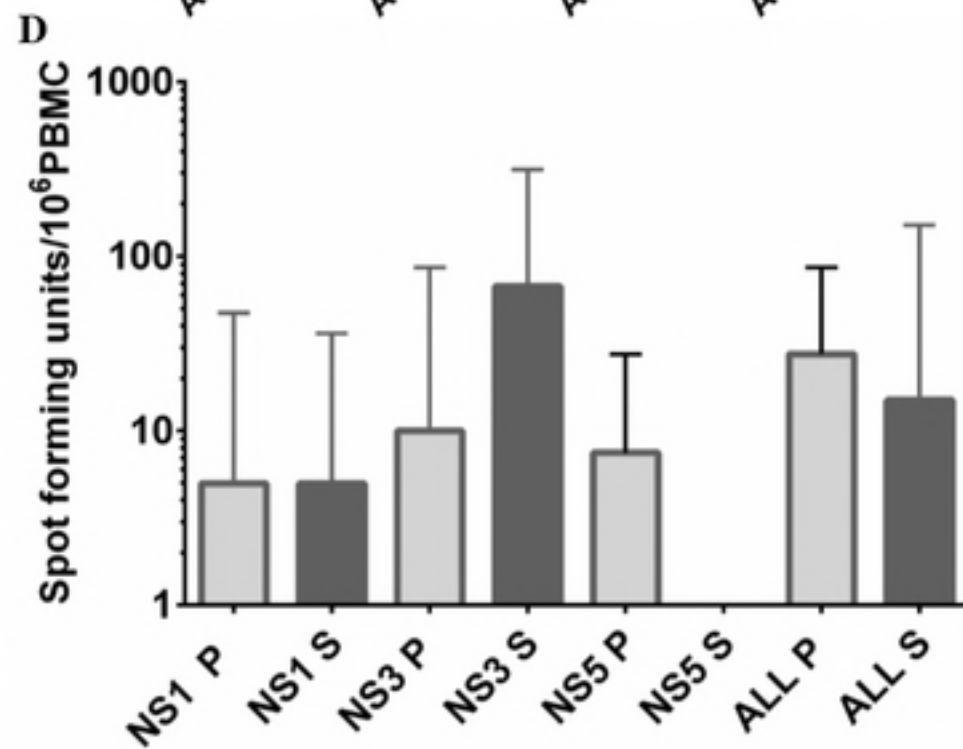



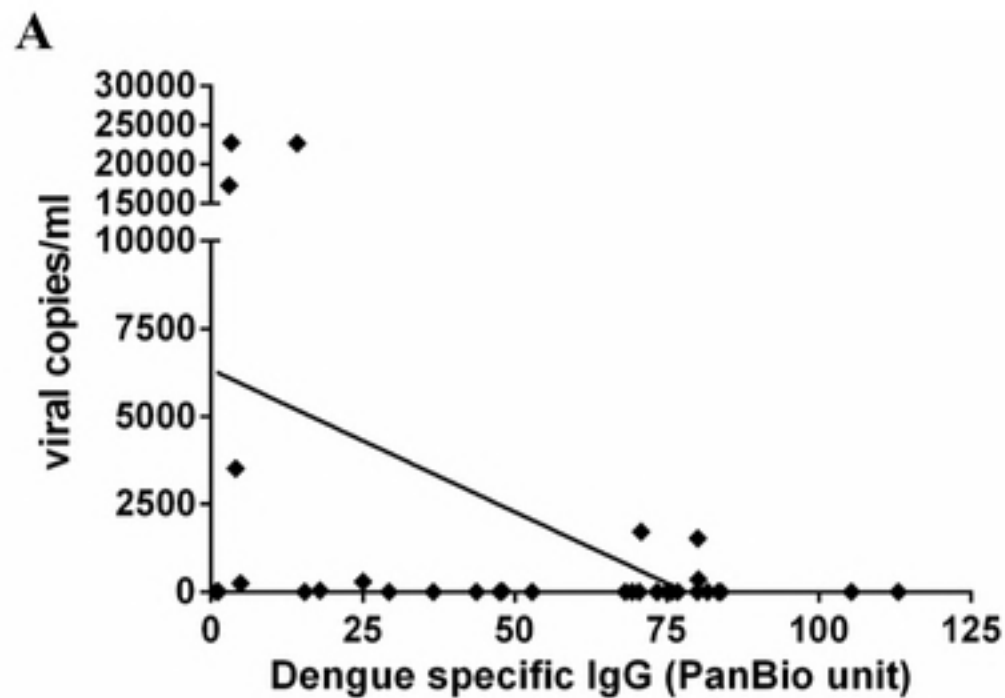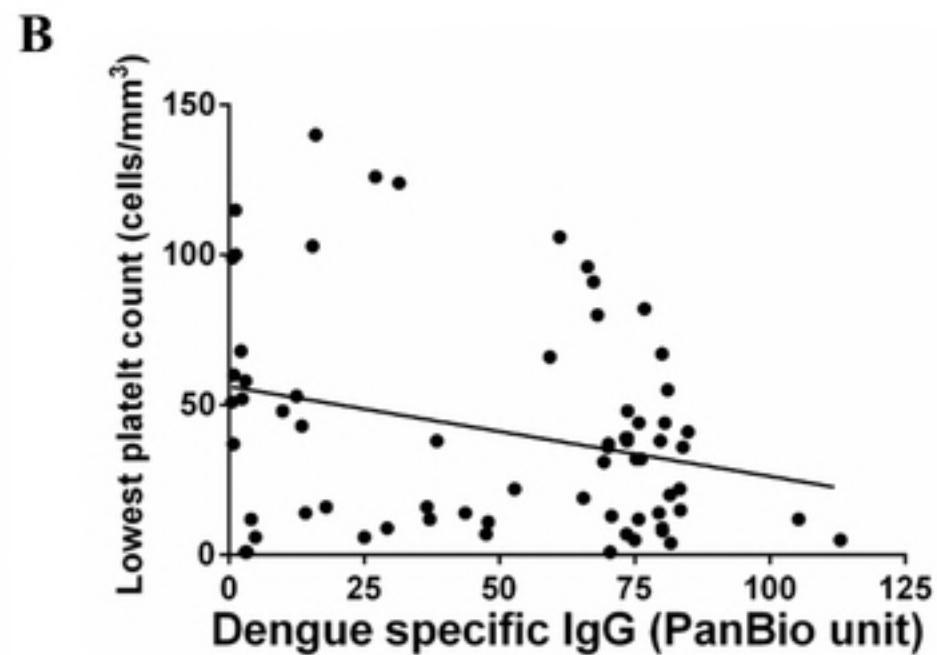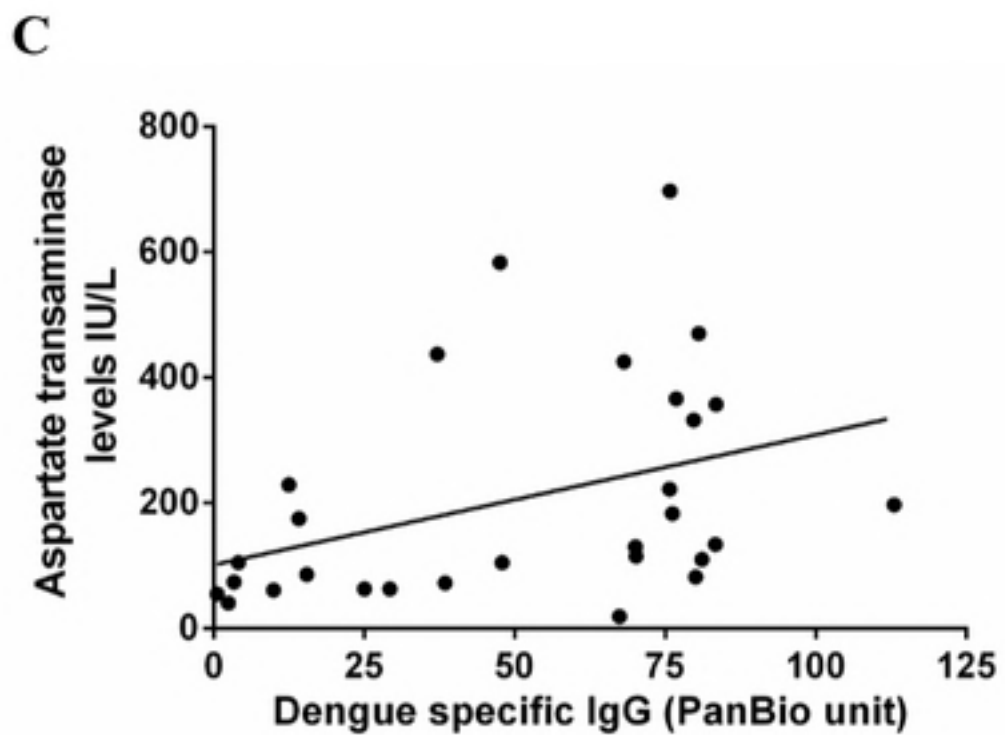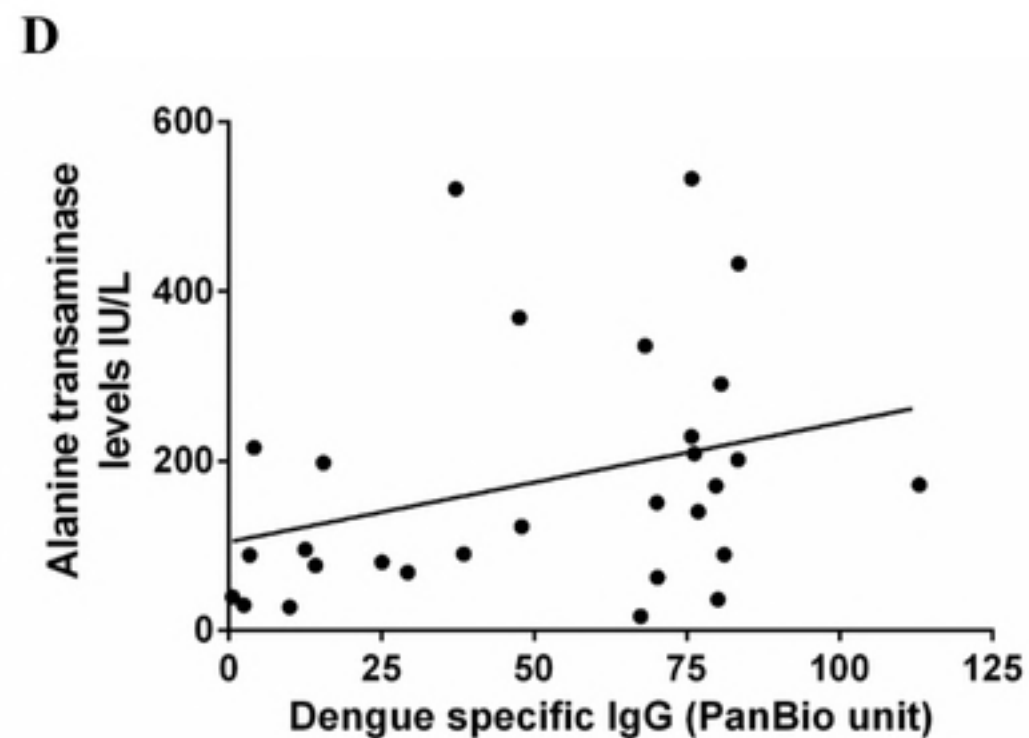

Source: https://www.biorxiv.org/content/10.1101/325944v1.full.pdf
